# Supplementary material for: Impact of 3-Amino-1,2,4-Triazole (3-AT)-Derived Increase in Hydrogen Peroxide Levels on Inflammation and Metabolism in Human Differentiated Adipocytes
Source: PubMed Central journal article supplement (PMC4811533; doi:10.1371/journal.pone.0152550), 2016-03-29

A

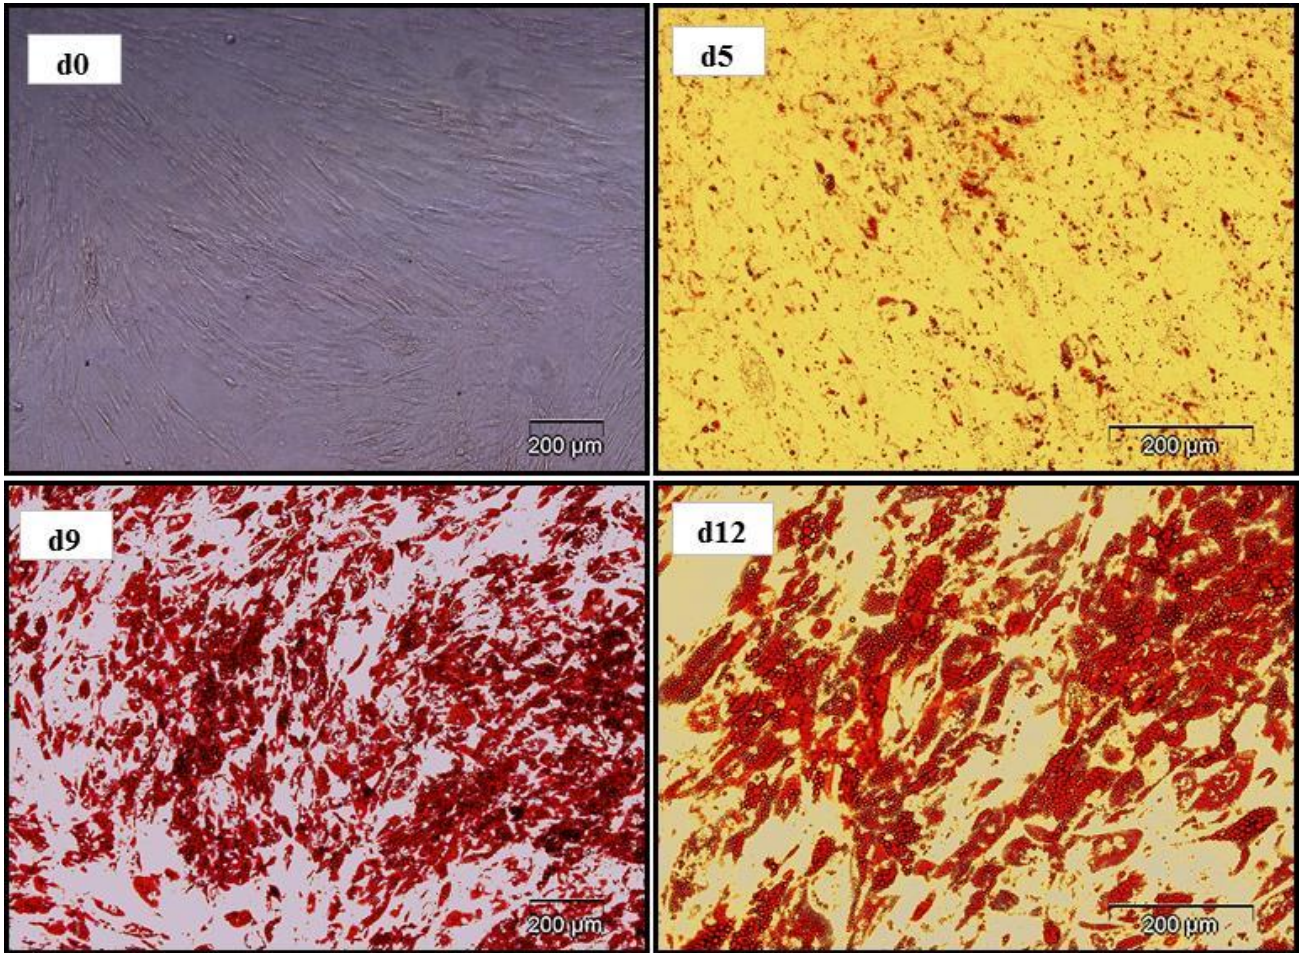

B

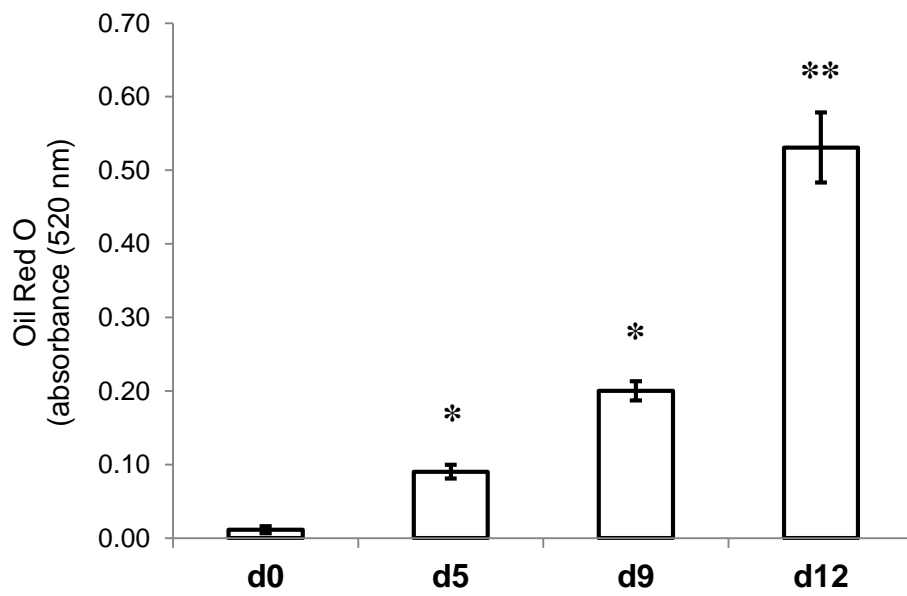

Supplement: pone.0152550.s001.pdf [file pone.0152550.s001.pdf]
